# Supplementary material for: Association among oral symptoms, oral health-related quality of life, and health-related quality of life in a sample of adults living with HIV/AIDS in Malaysia
Source: PubMed Central journal article supplement (PMC5568203; doi:10.1186/s12903-017-0409-y), 2017-08-22
Supplement: 12903_2017_409_MOESM1_ESM.pdf [file 12903_2017_409_MOESM1_ESM.pdf]

## Structured Questionnaire

Please answer all questions

---

### Personal Characteristics

1. Age: .....years

2. Sex:

Male

Female

3. Ethnic group:

Malay

Chinese

Indian

Others

Please state .....

4. Highest education level:

No formal education

Primary/Elementary school

Secondary school/'O' level

Vocational training/Certificate

Diploma/'A' Level

Tertiary level/Degree

5. Marital status:

Never been married

Married

Divorced

Widowed

6. Employment status:

Regular job

Odd job

Unemployed

7. Total personal monthly income: RM.....

(Please estimate if you do not remember the exact amount)

**HIV Status**

8. Route of HIV exposure:

- Injecting drug
- Sexual contact
- Others  Please state .....

9. Duration of HIV infection: .....years

10. HAART treatment status:

- Yes
- No

11. Duration of HAART treatment: .....years

12. Latest CD4+ cell count (cell/mm<sup>3</sup>):

- 199 and below
- 200-499
- 500 and above

13. Presence of co-infection:

- Hepatitis C  Yes  No
- Tuberculosis  Yes  No

**Perceived Oral Health Status**

14. In general, how do you rate your current oral health status?

|           |                          |
|-----------|--------------------------|
| Very good | <input type="checkbox"/> |
| Good      | <input type="checkbox"/> |
| Fair      | <input type="checkbox"/> |
| Poor      | <input type="checkbox"/> |
| Very poor | <input type="checkbox"/> |

15. Do you have any of the following oral health problem?

|                 |                                                  |                             |
|-----------------|--------------------------------------------------|-----------------------------|
| Toothache       | <input type="checkbox"/> Yes                     | <input type="checkbox"/> No |
| Cavitated tooth | <input type="checkbox"/> Yes                     | <input type="checkbox"/> No |
| Gum pain        | <input type="checkbox"/> Yes                     | <input type="checkbox"/> No |
| Gum swelling    | <input type="checkbox"/> Yes                     | <input type="checkbox"/> No |
| Gum bleeding    | <input type="checkbox"/> Yes                     | <input type="checkbox"/> No |
| Gum abscess     | <input type="checkbox"/> Yes                     | <input type="checkbox"/> No |
| Loose tooth     | <input type="checkbox"/> Yes                     | <input type="checkbox"/> No |
| Bad breath      | <input type="checkbox"/> Yes                     | <input type="checkbox"/> No |
| Mouth ulcer     | <input type="checkbox"/> Yes                     | <input type="checkbox"/> No |
| Others          | <input type="checkbox"/> Yes. Please state ..... |                             |

**THANK YOU**
